# Supplementary material
Source: publisher figshare collection journal article supplement (https://acs.figshare.com/ndownloader/files/4011793)
Supplement: Supplementary file 1 [file 4011793]

# Modification of Ozone Deposition and I<sub>2</sub> Emissions at the Air-Aqueous Interface by Dissolved Organic Carbon of Marine Origin

*Marvin D. Shaw<sup>1,2</sup> and Lucy J. Carpenter<sup>\*1</sup>*

1. Department of Chemistry, University of York, Heslington, York, UK YO10 5DD.
2. Now at Lancaster Environment Centre, Lancaster University, Lancaster, UK LA1 4YW

## Supporting Information

8 pages

**Figure S1.** Experimental set up used to investigate ozone uptake by iodide

in PBS, pH 8, and quantify gaseous molecular iodine emission.

**Figure S2.** Pseudo first order ozone uptake to iodide PBS (pH8). Empty diamonds,  $5 \times 10^{-6} \text{ M l}^{-1}$ ; filled diamonds,  $1 \times 10^{-5} \text{ M [I}^{-}\text{]}$ . The y error bars are calculated from the propagation of the quoted MFC error (2.5%), the calibration error and the standard deviation of replicate analyses.

**Table S1.** Calculated reaction rate constants,  $\lambda$ , for DOC + O<sub>3</sub> reactions in seawater at 298K.

## Supporting Information

Description of the parallel resistance approach of the ozone uptake potential of seawater, figures S1-S2 and table S1. This material is available free of charge via the Internet at <http://pubs.acs.org>.

### The parallel resistance approach

The ozone uptake potential of seawater can be considered as a mechanism involving two layers, an overlying air and surface water layer. The overlying air layer offers an aerodynamic resistance ( $r_a$ ) to ozone deposition from the air to seawater and the surface water layer provides an aqueous phase resistance ( $r_s$ ). The total resistance ( $r_t$ ) is the sum of the resistances in these layers, as shown in equation (1), which is related to the deposition velocity ( $v_d$ ) by equation (7), in manuscript<sup>2-3</sup>. The term  $r_a$  is determined by mixing in the atmosphere and will be similar in value to the corresponding resistance to the transfer of heat and other trace gases<sup>4</sup>. Being relatively insoluble, atmospheric ozone deposition is determined (~95%) by  $r_s$  in the surface seawater which is a function of the chemical loss rate ( $\lambda$ , s<sup>-1</sup>) in seawater<sup>5-6</sup>, where  $H$  is the dimensionless Henry's law constant,  $D$  is the molecular diffusivity of O<sub>3</sub> in water (m<sup>2</sup> s<sup>-1</sup>),  $k_i$  is the second order kinetic rate constant and  $C_i$  is the reactant concentration, equations 8 and 9, in manuscript. Considering equation (1), it follows that the ozone deposition rate is dependent on the assumed value for the (pH dependent) O<sub>3</sub> + I<sup>-</sup> reaction rate constant  $k_I$  as well as competing reactions for O<sub>3</sub> in surface seawater.

$$r_t = r_a + r_s \quad (1)$$

The aerodynamic resistance ( $r_a$ ) of the experimental system was determined from the ozone deposition velocity over 0.02 M [I<sup>-</sup>] solutions, wherein  $r_s$  is considered negligible. At an ozone concentration of 70 ppbv and a flow rate of 0.2 L min<sup>-1</sup> (i.e. the same experimental conditions as used throughout the study),  $r_a$  was determined as 7.7 m<sup>-1</sup> s.

Equation (8), in manuscript, represents the deposition velocity due solely to molecular gas-transfer including molecular diffusion and chemical reactions, and is applicable in laboratory conditions or when wind speed is low. Wanninkhof (1992)<sup>7</sup> assumed that deposition was also controlled by interactions between wind-induced turbulent transport and chemical enhancement, and Chang et al. (2004)<sup>8</sup> proposed a general formula for  $r_s$  to account for this as follows:

$$r_s = H / ( \alpha k_w + (\lambda D)^{1/2} ) \quad (2)$$

where  $k_w$  is the gas-transfer velocity, a function of wind speed at 10 m height, and  $\alpha$  the chemical enhancement factor.

Note that whilst the parallel resistance approach to oceanic ozone deposition is used extensively, improved models have been developed more recently that describe the dependencies of deposition on atmospheric and oceanic processes from a more fundamental perspective<sup>9</sup>.

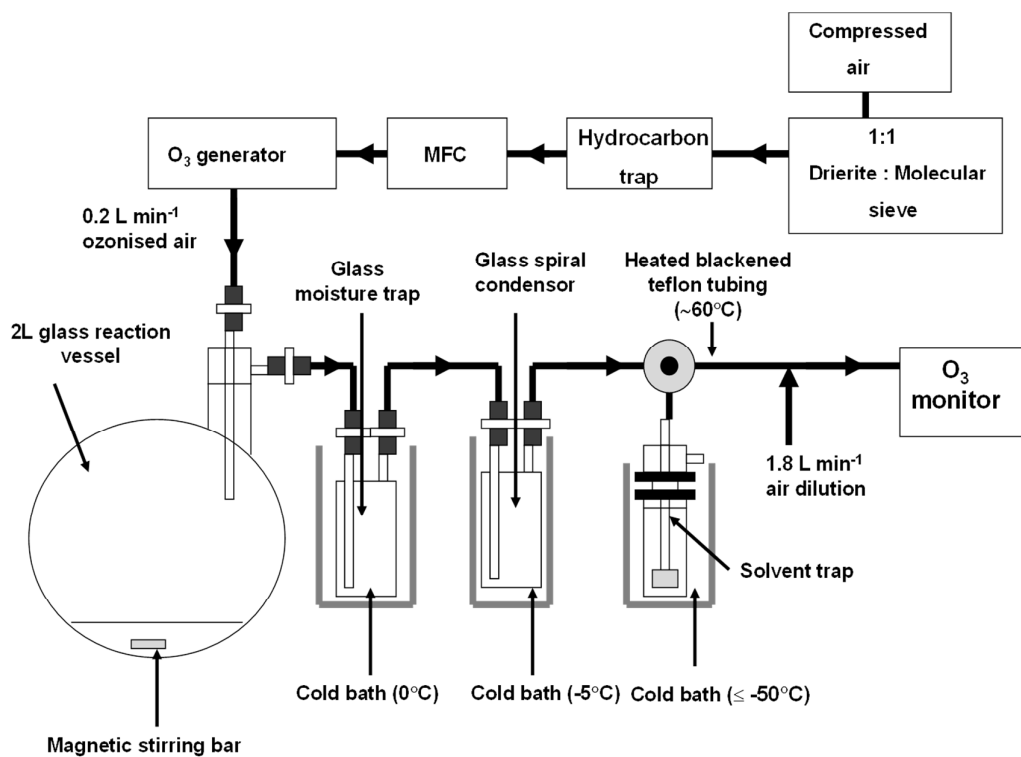

● 3 way adjustable tap

➔ Gas transfer lines (PFA, covered with black tape)

**MFC** Mass flow controller

**Figure S1.** Experimental set up used to investigate ozone uptake by iodide in PBS (pH 8, 293 K) and quantify gaseous molecular iodine emission.

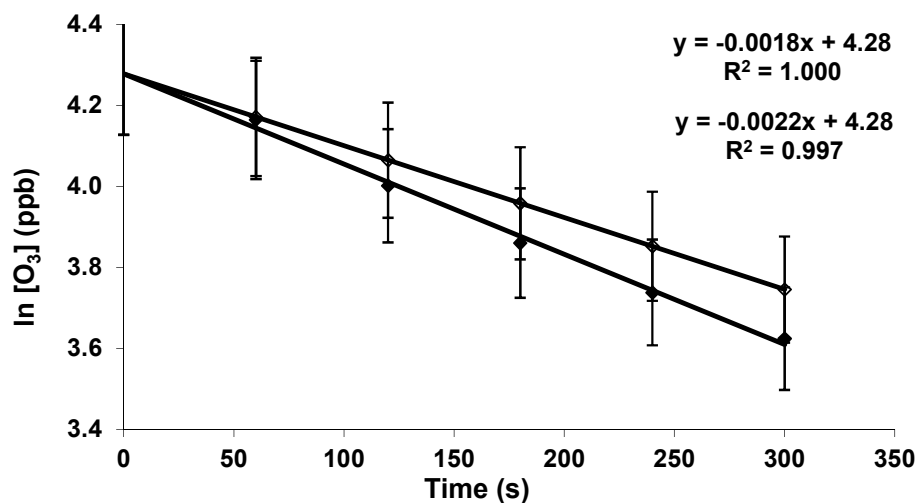

**Figure S2.** Pseudo first order ozone uptake to iodide PBS (pH8). Empty diamonds,  $5 \times 10^{-6} \text{ M } [\text{I}^-]$ ; filled diamonds,  $1 \times 10^{-5} \text{ M } [\text{I}^-]$ . The  $y$  error bars are calculated from the propagation of the quoted MFC error (2.5%), the calibration error and the standard deviation of replicate analyses.

| Compound             | Molarity<br>(10 <sup>-9</sup> mol dm <sup>-3</sup> ) | <i>k</i><br>(mol <sup>-1</sup> dm <sup>3</sup> s <sup>-1</sup> ) | $\lambda$ (s <sup>-1</sup> ) | References |
|----------------------|------------------------------------------------------|------------------------------------------------------------------|------------------------------|------------|
| DMS                  | 5(0.04 – 316)                                        | 8.6 x 10 <sup>8</sup>                                            | 4.3 (0.04 – 272)             | 10-11      |
| Ethene               | 0.5                                                  | 1.8 x 10 <sup>5</sup>                                            | 1.8 x 10 <sup>-4</sup>       | 12-13      |
| Propene              | 0.2                                                  | 8.0 x 10 <sup>5</sup>                                            | 3.2 x10 <sup>-4</sup>        | 12-13      |
| Isoprene             | 0.05                                                 | 4.0 x 10 <sup>5</sup>                                            | 2 x 10 <sup>-5</sup>         | 14         |
| <i>Chlorophyll a</i> | 2000 – 10,000                                        | 6 x 10 <sup>7</sup>                                              | 120 – 1200*                  | 15         |
| Phenol               | 2.34                                                 | 1.3 x 10 <sup>3</sup>                                            | 3.0 x 10 <sup>-6</sup>       | 16-17      |
| Phenolate            | 0.23                                                 | 1.4 x 10 <sup>9</sup>                                            | 0.32                         | 16-17      |
| P-cresol             | 0.14                                                 | 3.0 x 10 <sup>4</sup>                                            | 0.56                         | 16, 18     |
| TOTAL                |                                                      |                                                                  | (126 – 1473)                 |            |

**Table S1.** Calculated reaction rate constants,  $\lambda$ , for DOC + O<sub>3</sub> reactions in seawater at 298K.

\* Calculated assuming *Chl a* concentrations were free to react at the surface of solution.

## Supporting Information References

1. Dixneuf, S.; Ruth, A. A.; Vaughan, S.; Varma, R. M.; Orphal, J., The time dependence of molecular iodine emission from *Laminaria digitata*. *Atmos. Chem. Phys.* **2009**, 9 (3), 823-829.
2. Galbally, I. E.; Roy, C. R., Destruction of ozone at the earth's surface. *Q. J. Roy. Meteor. Soc.* **1980**, 106 (449), 599-620.
3. Gallagher, M. W.; Beswick, K. M.; Coe, H., Ozone deposition to coastal waters. *Q. J. Roy. Meteor. Soc.* **2001**, 127 (572), 539-558.
4. Garland, J. A.; Elzerman, A. W.; Penkett, S. A., The Mechanism for Dry Deposition of Ozone to Seawater Surfaces. *J. Geophys. Res.* **1980**, 85 (12), 7488-7492.
5. Lenschow, D. H.; Pearson, R.; Stankov, B. B., Measurements of Ozone Vertical Flux to Ocean and Forest. *J. Geophys. Res.* **1982**, 87 (Nc11), 8833-8837.
6. Schwartz, S. E.; Slinn, W. G. N., *Precipitation Scavenging and Stmosphere-Surface Exchange: Atmosphere-Surface Exchange Processes. The semonin volume*. Hemisphere Publishing Corporation: 1992; Vol. 2, p 789-801.
7. Wanninkhof, R., Relationship between Wind-Speed and Gas-Exchange over the Ocean. *J. Geophys. Res.* **1992**, 97 (C5), 7373-7382.
8. Chang, W. N.; Heikes, B. G.; Lee, M. H., Ozone deposition to the sea surface: chemical enhancement and wind speed dependence. *Atmos. Environ.* **2004**, 38 (7), 1053-1059.
9. Fairall, C. W.; Helmig, D.; Ganzeveld, L.; Hare, J., Water-side turbulence enhancement of ozone deposition to the ocean. *Atmos. Chem. Phys.* **2007**, 7 (2), 443-451.
10. Gershenzon, M.; Davidovits, P.; Jayne, J. T.; Kolb, C. E.; Worsnop, D. R., Simultaneous uptake of DMS and ozone on water. *J. Phys. Chem. A* **2001**, 105 (29), 7031-7036.
11. Campos, M. L. A. M.; Sanders, R.; Jickells, T., The dissolved iodate and iodide distribution in the South Atlantic from the Weddell Sea to Brazil. *Mar. Chem.* **1999**, 65 (3-4), 167-175.
12. Kettle, A. J.; Andreae, M. O.; Amouroux, D.; Andreae, T. W.; Bates, T. S.; Berresheim, H.; Bingemer, H.; Boniforti, R.; Curran, M. A. J.; DiTullio, G. R.; Helas, G.; Jones, G. B.; Keller, M. D.; Kiene, R. P.; Leck, C.; Lefebvre, M.; Malin, G.; Maspero, M.; Matrai, P.; McTaggart, A. R.; Mihalopoulos, N.; Nguyen, B. C.; Novo, A.; Putaud, J. P.; Rapsomanikis, S.; Roberts, G.; Schebeske, G.; Sharma, S.; Simo, R.; Staubes, R.; Turner, S.; Uher, G., A global database of sea surface dimethylsulfide (DMS) measurements and a procedure to predict sea surface DMS as a function of latitude, longitude, and month. *Global. Biogeochem. Cy.* **1999**, 13 (2), 399-444.
13. Dowideit, P.; von Sonntag, C., Reaction of ozone with ethene and its methyl- and chlorine-substituted derivatives in aqueous solution. *Environ. Sci. Technol.* **1998**, 32 (8), 1112-1119.
14. Broadgate, W. J.; Liss, P. S.; Penkett, S. A., Seasonal emissions of isoprene and other reactive hydrocarbon gases from the ocean. *Geophys. Res. Lett.* **1997**, 24 (21), 2675-2678.
15. McClain, C. R., A decade of satellite ocean color observations. *Ann. Rev. Mar. Sci.* **2009**, 1, 19-42.
16. Hayase, S.; Yabushita, A.; Kawasaki, M.; Enami, S.; Hoffmann, M. R.; Colussi, A. J., Heterogeneous reaction of gaseous ozone with aqueous iodide in the presence of aqueous organic species. *J. Phys. Chem. A* **2010**, 114 (19), 6016-6021.
17. Cardellicchio, N.; Cavalli, S.; Piangerelli, V.; Giandomenico, S.; Ragone, P., Determination of phenols in environmental samples by liquid chromatography-electrochemistry. *Fres. J. Anal. Chem.* **1997**, 358 (6), 749-754.

18. Boyd, T. J., Identification and quantification of mono-, di- and trihydroxybenzenes (phenols) at trace concentrations in seawater by aqueous acetylation and gas chromatographic—mass spectrometric analysis. *J. Chrom. A.* **1994**, 662 (2), 281-292.
